# Supplementary material for: Reinvestigation of the Oxidative Folding Pathways of Hen Egg White Lysozyme: Switching of the Major Pathways by Temperature Control
Source: Int J Mol Sci. 2013 Jun 26;14(7):13194–212. doi: 10.3390/ijms140713194 (PMC3742182; doi:10.3390/ijms140713194)

# Supplementary Information

## 1. Ellman's Assay

**Figure S1.** Relative concentration of SH groups estimated by Ellman's assay for the sample solutions (without AEMTS blocking) obtained by the oxidation of R with one, two, three, and four equivalents of DHS<sup>ox</sup> for 1 min at pH 8.0 and 25 °C in the presence of 4 M urea.

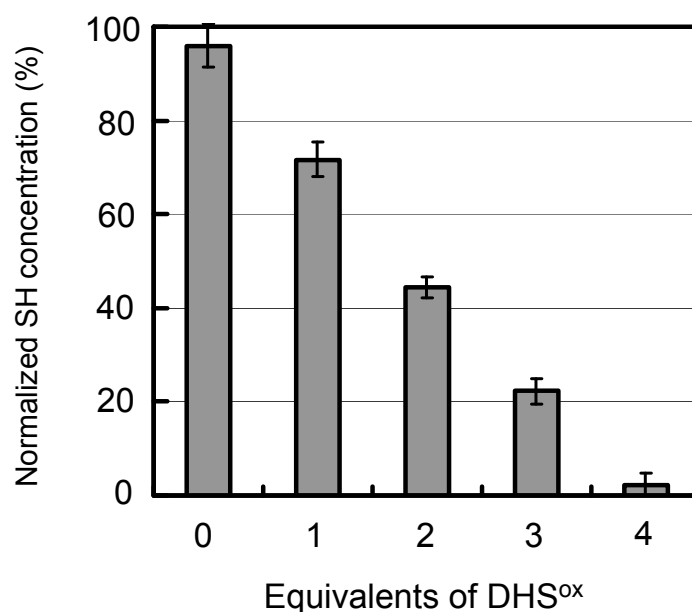

## 2. Summary of Mass Numbers Obtained by ESI-TOF-MS Analysis

**Table S1.** Expected and observed mass numbers for R, 1S, 2S, 3S, 4S, des[76–94], des[64–80], des[6–127], and N with AEMTS blocking.

| Species                 | Expected Mass ( <i>m/z</i> ) | Obsd. Mass ( <i>m/z</i> ) | Charge | Calcd. Mass ( <i>m/z</i> ) <sup>a</sup> |
|-------------------------|------------------------------|---------------------------|--------|-----------------------------------------|
| R <sup>b</sup>          | 14915                        | 1658.19924                | +9     | 14915                                   |
| R <sup>c</sup>          | 14915                        | 1492.497                  | +10    | 14915                                   |
| 1S <sup>c</sup>         | 14763                        | 1477.355                  | +10    | 14764                                   |
| 2S <sup>c</sup>         | 14611                        | 1461.785                  | +10    | 14608                                   |
| 3S <sup>c</sup>         | 14459                        | 1446.813                  | +10    | 14458                                   |
| 4S <sup>c</sup>         | 14307                        | 1431.619                  | +10    | 14306                                   |
| des[76–94] <sup>b</sup> | 14459                        | 2892.85095                | +5     | 14459                                   |
| des[64–80] <sup>b</sup> | 14459                        | 2892.83217                | +5     | 14459                                   |
| des[6–127] <sup>b</sup> | 14459                        | 2892.77762                | +5     | 14459                                   |
| N <sup>b</sup>          | 14307                        | 2862.43854                | +5     | 14307                                   |

<sup>a</sup> The calculated mass numbers were obtained from the observed mass numbers using the equation, (Calcd. Mass) = (Obsd. Mass) x (Charge) – (Charge), based on the reaction,  $M + nH^+ \rightarrow MH_n^{n+}$ .

<sup>b</sup> The species separated by reverse-phase HPLC analysis. <sup>c</sup> The species observed in Figure 2.

### 3. Mass Chromatograms for Thermolysin-Digested des[76–94], des[64–80] and des[6–127] Intermediates

**Figure S2.** Mass chromatogram of the peptide fragments obtained from des[76–94] by thermolysin digestion. The peak numbers correspond to those in Table S2. Non-labeled peaks could not be assigned reasonably. 0.1% TFA in water and 0.1% TFA in acetonitrile were employed as eluents.

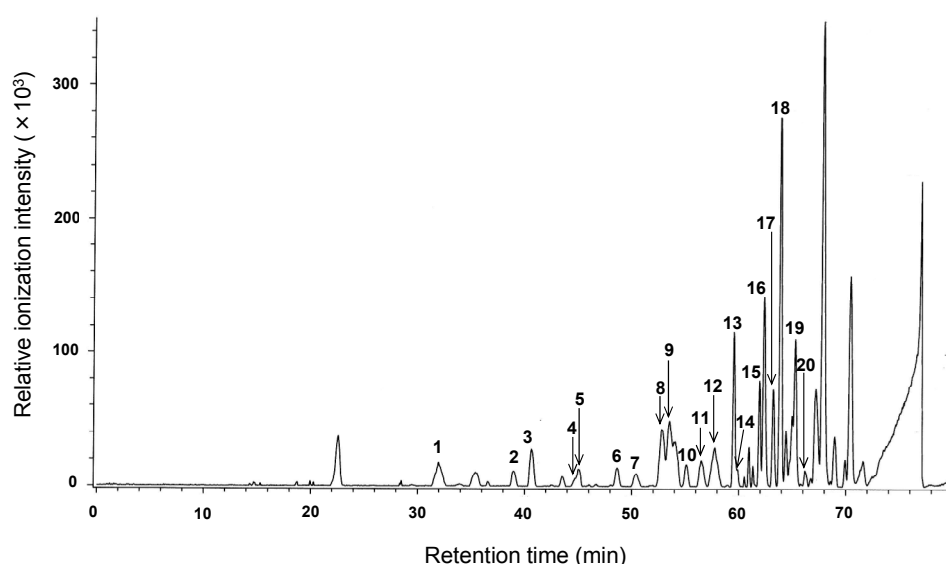

**Table S2.** Structure assignments for the thermolysin-digested fragments of des[76–94]. <sup>a</sup>

| Peak No. <sup>b</sup> | Retention time (min) | Expected mass | Observed mass               | Peptide Fragment | Cys or SS pairing |
|-----------------------|----------------------|---------------|-----------------------------|------------------|-------------------|
| 1                     | 31.99                | 690.32        | 691.50 (+1)                 | 105–110          | No Cys            |
| 2                     | 38.97                | 505.53        | 504.27 (+1)                 | 86–90            | No Cys            |
| 3                     | 40.67                | 574.59        | 575.29 (+1)                 | 42–46            | No Cys            |
| 4                     | 44.74                | 520.60        | 521.30 (+1)                 | 105–108          | No Cys            |
| 5                     | 45.09                | 644.68        | 644.35 (+1)                 | 20–24            | No Cys            |
| 6                     | 48.67                | 538.22        | 539.22 (+1)                 | 74–77            | Cys76             |
| 7                     | 50.46                | 719.68        | 721.35 (+1)<br>361.17 (+2)  | 43–48            | No Cys            |
| 8                     | 52.84                | 627.75        | 628.35 (+1)                 | 12–16            | NoCys             |
| 9                     | 53.54                | 488.53        | 489.28 (+1)                 | 58–61            | NoCys             |
| 10                    | 55.10                | 698.84        | 699.39 (+1)                 | 11–16            | NoCys             |
| 11                    | 56.50                | 505.53        | 505.30 (+1)                 | 103–107          | No Cys            |
| 12                    | 57.78                | 394.42        | 395.20 (+1)                 | 20–22            | No Cys            |
| 13                    | 59.53                | 660.66        | 661.33 (+1)                 | 98–104           | No Cys            |
| 14                    | 59.89                | 922.93        | 922.42 (+1)                 | 69–77            | Cys76             |
| 15                    | 61.92                | 905.96        | 906.42 (+1)                 | 83–91            | No Cys            |
| 16                    | 62.36                | 736.38        | 767.38 (+1)                 | 92–97            | Cys94             |
| 17                    | 63.22                | 1208.44       | 1208.61 (+1)<br>604.81 (+2) | 62–66, 67–73     | Cys30–Cys115      |

**Table S2.** *Cont.*

| Peak No. <sup>b</sup> | Retention time (min) | Expected mass | Observed mass               | Peptide Fragment | Cys or SS pairing |
|-----------------------|----------------------|---------------|-----------------------------|------------------|-------------------|
| 18                    | 63.86                | 1178.42       | 1179.64 (+1)<br>589.81 (+2) | 4–7, 124–129     | Cys6–Cys127       |
| 19                    | 65.25                | 1050.07       | 1049.49 (+1)                | 62–66, 78–80     | Cys64–Cys80       |
| 20                    | 66.20                | 1324.66       | 1325.69 (+1)<br>663.35 (+2) | 3–7, 124–129     | Cys6–Cys127       |

<sup>a</sup> Detailed experimental conditions are described in the text. <sup>b</sup> The number corresponds of the peak number in Figure S2.

**Table S3.** Structure assignments for the thermolysin-digested fragments of des[64–80]. <sup>a</sup>

| Peak No. | Retention time (min) | Expected mass | Observed mass              | Peptide Fragment | Cys or SS pairing |
|----------|----------------------|---------------|----------------------------|------------------|-------------------|
| 1        | 1.99                 | 374.43        | 375.67 (+1)                | 105–110          | No Cys            |
| 2        | 2.33                 | 574.59        | 574.46 (+1)                | 42–46            | No Cys            |
| 3        | 2.48                 | 432.42        | 433.61 (+1)                | 39–42            | No Cys            |
| 4        | 3.39                 | 505.53        | 504.58 (+1)                | 103–107          | No Cys            |
| 5        | 4.63                 | 488.54        | 488.57 (+1)                | 25–28            | No Cys            |
| 6        | 5.05                 | 394.42        | 394.60 (+1)                | 20–22            | No Cys            |
| 7        | 8.15                 | 533.56        | 532.48 (+1)                | 83–87            | No Cys            |
| 8        | 13.21                | 660.66        | 660.47 (+1)                | 98–104           | NoCys             |
| 9        | 35.71                | 669.61        | 668.49 (+1)                | 63–67            | Cys64             |
| 10       | 39.22                | 977.02        | 976.05 (+1)<br>488.53 (+2) | 98–107           | NoCys             |
| 11       | 54.32                | 627.75        | 627.58 (+1)                | 12–16            | No Cys            |
| 12       | 55.34                | 1007.97       | 1008.92 (+1)               | 75–77, 92–97     | Cys76–Cys94       |
| 13       | 55.34                | 1055.50       | 1052.86 (+1)               | 3–7, 126–129     | Cys6–Cys127       |

<sup>a</sup> Detailed experimental conditions are described in the text. <sup>b</sup> The number corresponds of the peak number in Figure S3.

**Figure S3.** Mass chromatogram of the peptide fragments obtained from des[64–80] by thermolysin digestion. The peak numbers correspond to those in Table S3. Non-labeled peaks could not be assigned reasonably. 0.1% formic acid in water and 0.1% formic acid in acetonitrile were employed as eluents.

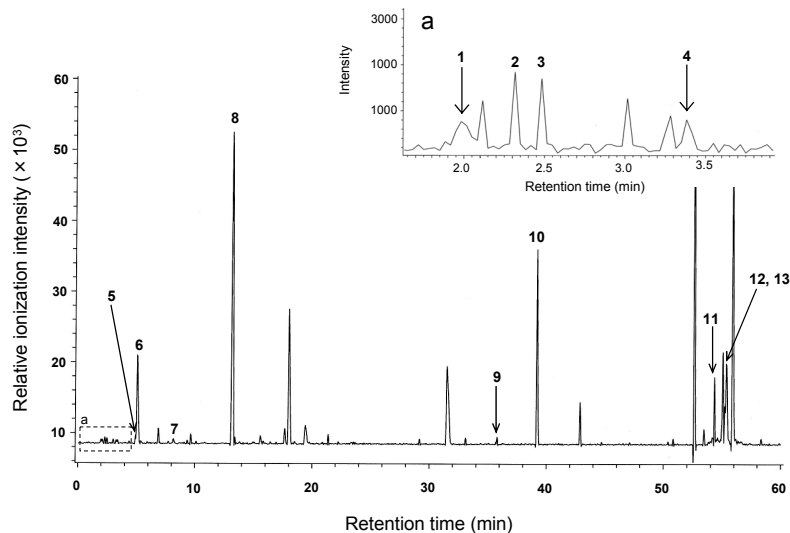

**Figure S4.** Mass chromatogram of the peptide fragments obtained from des[6–127] by thermolysin digestion. The peak numbers correspond to those in Table S4. Non-labeled peaks could not be assigned reasonably. 0.1% formic acid in water and 0.1% formic acid in acetonitrile were employed as eluents.

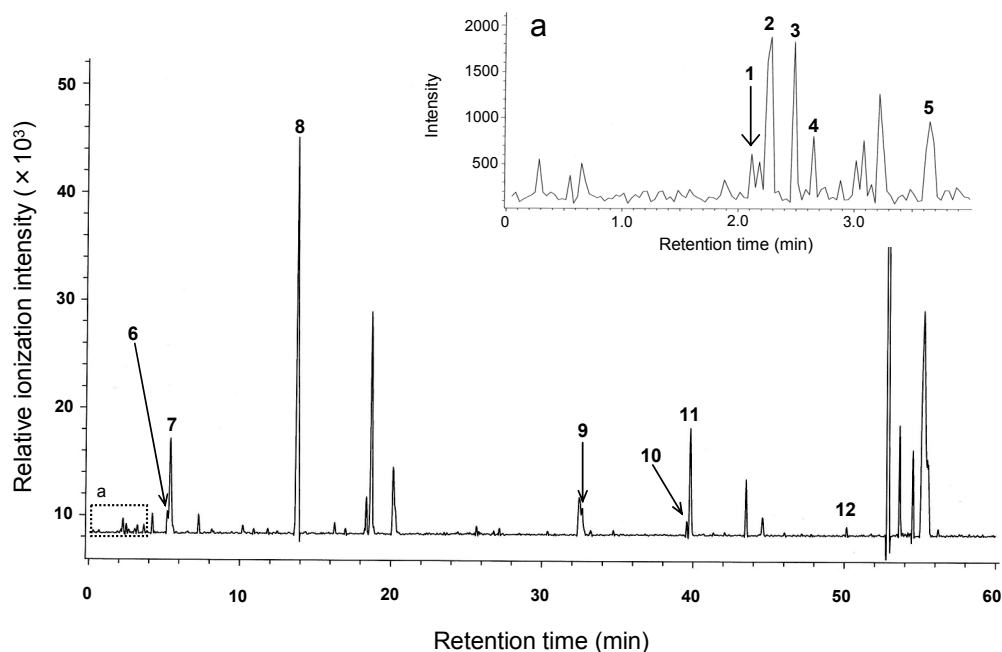

**Table S4.** Structure assignments for the thermolysin-digested fragments of des[6–127].<sup>a</sup>

| Peak No. | Retention time (min) | Expected mass | Observed mass            | Peptide Fragment | Cys or SS pairing |
|----------|----------------------|---------------|--------------------------|------------------|-------------------|
| 1        | 2.12                 | 374.43        | 376.27                   | 108–110          | No Cys            |
| 2        | 2.28                 | 539.18        | 539.30                   | 4–7              | Cys6              |
| 3        | 2.49                 | 574.59        | 575.38                   | 42–46            | No Cys            |
| 4        | 2.65                 | 432.42        | 433.61                   | 39–42            | No Cys            |
| 5        | 3.66                 | 505.53        | 505.38                   | 103–107          | No Cys            |
| 6        | 5.21                 | 488.54        | 489.35                   | 25–28            | No Cys            |
| 7        | 5.41                 | 394.42        | 395.24                   | 20–22            | No Cys            |
| 8        | 13.77                | 660.66        | 661.42                   | 98–104           | No Cys            |
| 9        | 32.48                | 1078.72       | 1077.15                  | 63–68, 78–80     | Cys64–Cys80       |
| 10       | 39.58                | 785.80        | 787.44                   | 2–7              | Cys6              |
| 11       | 39.81                | 977.02        | 977.65(+1)<br>489.33(+2) | 98–107           | No Cys            |
| 12       | 50.14                | 893.91        | 893.21                   | 75–76, 92–97     | Cys76–Cys94       |

<sup>a</sup> Detailed experimental conditions are described in the text. <sup>b</sup> The number corresponds of the peak number in Figure S4.

#### 4. HPLC Chromatogram Obtained by Oxidative Folding at 5 °C using 2 Equivalents of DHS<sup>ox</sup>

**Figure S5.** Reverse-phase HPLC chromatogram of the solution (with AEMTS blocking) obtained by the reduction pulse experiments of HEL using DTT<sup>red</sup> as a reductant at 5 °C and pH 8.0 in the presence of 2 M urea. Folding conditions was  $[R]_0 = [DHS^{ox}]_0/2 = 53.6 \mu\text{M}$  for 300 min. The reduction pulse condition was 6 mM DTT<sup>red</sup> for 3 min at 5 °C.

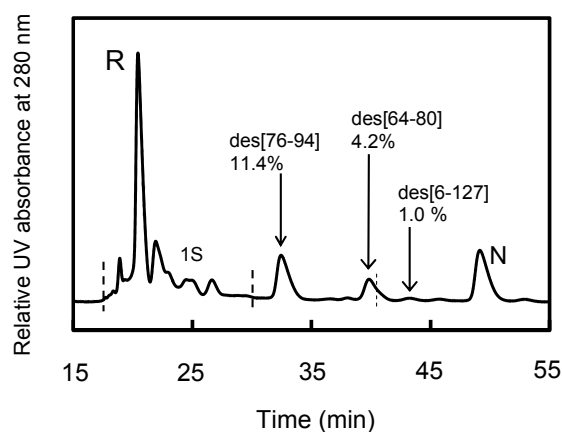

Supplement: Supplementary file 1 [file ijms-14-13194-s001.pdf]
